# Supplementary material
Source: PubMed Central journal article supplement (PMC6825401)
Supplement: NIHMS1055115-supplement-1.pdf [file NIHMS1055115-supplement-1.pdf]

| <b>Variables</b>                 | <b>GE - VSS</b> | <b>GE - VIS</b> | <b>Philips - VSS</b> | <b>Philips - VIS</b> | <b>P-value</b> |
|----------------------------------|-----------------|-----------------|----------------------|----------------------|----------------|
| <i>Apical Posterior Strain</i>   |                 |                 |                      |                      |                |
| <i>N (N missing)</i>             | 32 (3)          | 31 (4)          | 26 (9)               | 32 (3)               |                |
| <i>Mean (SD)</i>                 | -16.8 (9.2)     | -17.4 (10.7)    | -19.8 (7.0)          | -14.8 (10.7)         | 0.04           |
| <i>Basal Anteroseptal Strain</i> |                 |                 |                      |                      |                |
| <i>N (N missing)</i>             | 35 (0)          | 35 (0)          | 25 (10)              | 34 (1)               |                |
| <i>Mean (SD)</i>                 | -16.2 (5.2)     | -18.0 (6.8)     | -15.1 (4.8)          | -15.8 (6.2)          | 0.20           |
| <i>Basal Posterior Strain</i>    |                 |                 |                      |                      |                |
| <i>N (N missing)</i>             | 29 (6)          | 28 (7)          | 25 (10)              | 26 (9)               |                |
| <i>Mean (SD)</i>                 | -22.1 (7.0)     | -20.9 (7.8)     | -14.9 (6.3)          | -23.7 (7.3)          | 0.001          |
| <i>Mid Anteroseptal Strain</i>   |                 |                 |                      |                      |                |
| <i>N (N missing)</i>             | 35 (0)          | 35 (0)          | 28 (7)               | 34 (1)               |                |
| <i>Mean (SD)</i>                 | -17.8 (4.8)     | -19.0 (6.2)     | -15.4 (6.1)          | -19.1 (4.8)          | 0.05           |
| <i>Mid Posterior Strain</i>      |                 |                 |                      |                      |                |
| <i>N (N missing)</i>             | 30 (5)          | 25 (10)         | 26 (9)               | 27 (8)               |                |
| <i>Mean (SD)</i>                 | -21.1 (6.5)     | -17.2 (8.9)     | -20.2 (8.8)          | -18.8 (8.8)          | 0.07           |
| <b><u>4 Chamber</u></b>          |                 |                 |                      |                      |                |
| <i>Apical Lateral Strain</i>     |                 |                 |                      |                      |                |
| <i>N (N missing)</i>             | 33 (2)          | 34 (1)          | 32 (3)               | 35 (0)               |                |
| <i>Mean (SD)</i>                 | -21.5 (8.2)     | -21.4 (10.7)    | -19.7 (5.1)          | -22.3 (9.0)          | 0.18           |
| <i>Apical Septal Strain</i>      |                 |                 |                      |                      |                |
| <i>N (N missing)</i>             | 35 (0)          | 35 (0)          | 31 (4)               | 35 (0)               |                |
| <i>Mean (SD)</i>                 | -15.6 (7.7)     | -16.4 (7.2)     | -24.8 (6.3)          | -18.2 (6.7)          | <.0001         |
| <i>Basal Lateral Strain</i>      |                 |                 |                      |                      |                |
| <i>N (N missing)</i>             | 34 (1)          | 33 (2)          | 32 (3)               | 34 (1)               |                |
| <i>Mean (SD)</i>                 | -18.4 (7.5)     | -20.7 (8.2)     | -14.7 (5.2)          | -20.0 (7.9)          | <.0001         |
| <i>Basal Septal Strain</i>       |                 |                 |                      |                      |                |
| <i>N (N missing)</i>             | 35 (0)          | 35 (0)          | 32 (3)               | 35 (0)               |                |
| <i>Mean (SD)</i>                 | -15.2 (3.2)     | -16.8 (5.8)     | -14.9 (3.8)          | -16.7 (6.0)          | 0.15           |
| <i>Mid Lateral Strain</i>        |                 |                 |                      |                      |                |
| <i>N (N missing)</i>             | 34 (1)          | 34 (1)          | 32 (3)               | 33 (2)               |                |
| <i>Mean (SD)</i>                 | -22.1 (6.7)     | -19.7 (7.5)     | -21.9 (5.2)          | -19.1 (9.0)          | 0.10           |
| <i>Mid Septal Strain</i>         |                 |                 |                      |                      |                |
| <i>N (N missing)</i>             | 35 (0)          | 35 (0)          | 32 (3)               | 35 (0)               |                |
| <i>Mean (SD)</i>                 | -16.1 (4.0)     | -18.1 (4.1)     | -15.3 (4.0)          | -19.6 (5.5)          | 0.001          |

**Supplementary Table 1.** Assessment of effects of scanner and software (and their interaction) by repeated Measures ANOVA.

| <i>Variable</i>                  | <i>Scanner Effect</i> |                | <i>Software Effect</i> |                | <i>Interaction</i> |                |
|----------------------------------|-----------------------|----------------|------------------------|----------------|--------------------|----------------|
|                                  | <i>F</i>              | <i>P-value</i> | <i>F</i>               | <i>P-value</i> | <i>F</i>           | <i>P-value</i> |
| <b><u>Global Strain</u></b>      |                       |                |                        |                |                    |                |
| <i>2 Chamber Strain</i>          | 1.99                  | 0.17           | 32.48                  | <0.01          | 3.08               | 0.06           |
| <i>3 Chamber Strain</i>          | 0.02                  | 0.90           | 1.79                   | 0.18           | 0.29               | 0.75           |
| <i>4 Chamber Strain</i>          | 0.92                  | 0.34           | 47.82                  | <0.01          | 0.15               | 0.86           |
| <i>Average Strain</i>            | 1.21                  | 0.28           | 39.57                  | <0.01          | 0.93               | 0.40           |
| <b><u>Regional Strain</u></b>    |                       |                |                        |                |                    |                |
| <b>2 Chamber</b>                 |                       |                |                        |                |                    |                |
| <i>Apical Anterior Strain</i>    | 15.98                 | <0.01          | 6.15                   | 0.02           | 6.76               | 0.01           |
| <i>Apical Inferior Strain</i>    | 1.00                  | 0.33           | 0.21                   | 0.65           | 12.75              | <0.01          |
| <i>Basal Anterior Strain</i>     | 7.98                  | <0.01          | 9.46                   | <0.01          | 0.83               | 0.37           |
| <i>Basal Inferior Strain</i>     | 1.10                  | 0.30           | 2.70                   | 0.11           | 3.90               | 0.06           |
| <i>Mid Anterior Strain</i>       | 0.15                  | 0.70           | 31.45                  | <0.01          | 0.12               | 0.73           |
| <i>Mid Inferior Strain</i>       | 0.03                  | 0.87           | 1.24                   | 0.27           | 0.06               | 0.80           |
| <b>3 Chamber</b>                 |                       |                |                        |                |                    |                |
| <i>Apical Anterior Strain</i>    | 9.44                  | <0.01          | 0.01                   | 0.94           | 19.42              | <0.01          |
| <i>Apical Posterior Strain</i>   | 0.37                  | 0.55           | 5.25                   | 0.03           | 4.08               | 0.05           |
| <i>Basal Anteroseptal Strain</i> | 3.55                  | 0.07           | 1.83                   | 0.19           | 0.37               | 0.55           |
| <i>Basal Posterior Strain</i>    | 3.46                  | 0.07           | 6.78                   | 0.02           | 17.55              | <0.01          |
| <i>Mid Anteroseptal Strain</i>   | 1.16                  | 0.29           | 7.78                   | <0.01          | 2.04               | 0.16           |
| <i>Mid Posterior Strain</i>      | 0.10                  | 0.75           | 4.59                   | 0.04           | 1.18               | 0.29           |
| <b>4 Chamber</b>                 |                       |                |                        |                |                    |                |
| <i>Apical Lateral Strain</i>     | 0.65                  | 0.43           | 1.12                   | 0.30           | 4.03               | 0.05           |
| <i>Apical Septal Strain</i>      | 40.40                 | <0.01          | 7.71                   | <0.01          | 14.73              | <0.01          |
| <i>Basal Lateral Strain</i>      | 4.61                  | 0.04           | 18.33                  | <0.01          | 2.20               | 0.15           |
| <i>Basal Septal Strain</i>       | 0.07                  | 0.79           | 5.68                   | 0.02           | 0.03               | 0.87           |
| <i>Mid Lateral Strain</i>        | 0.03                  | 0.86           | 7.09                   | 0.01           | 0.05               | 0.83           |
| <i>Mid Septal Strain</i>         | 0.35                  | 0.56           | 21.02                  | <0.01          | 2.64               | 0.11           |

**Supplemental Table 2.** Agreement of TomTec output between GE and Philips images. Strains are in %. Positive mean bias indicates Philips was higher (more negative), negative mean bias indicates GE was higher (more negative).

| <i>Variable</i>                 | <i>Mean (SD)</i> | <i>Mean difference (SD<sub>b</sub>)</i> | <i>P-value</i> | <i>95% LOA</i> | <i>COV</i> |
|---------------------------------|------------------|-----------------------------------------|----------------|----------------|------------|
| <b><u>Global Strain</u></b>     |                  |                                         |                |                |            |
| <i>2 Chamber Average Strain</i> | -18.5 (4.8)      | 0.9 (3.7)                               | 0.16           | -6.4, 8.3      | 14.0       |
| <i>2 Chamber LoL Strain</i>     | -20.1 (4.9)      | -0.0 (3.5)                              | 0.87           | -7.0, 6.9      | 12.2       |

| <i>Variable</i>               | <i>Mean (SD)</i> | <i>Mean difference (SD<sub>b</sub>)</i> | <i>P-value</i> | <i>95% LOA</i> | <i>COV</i> |
|-------------------------------|------------------|-----------------------------------------|----------------|----------------|------------|
| 3 Chamber Average Strain      | -18.1 (4.3)      | -0.2 (3.4)                              | 0.72           | -7.1, 6.7      | 13.4       |
| 3 Chamber LoL Strain          | -19.1 (4.8)      | 0.0 (3.9)                               | 0.79           | -7.7, 7.8      | 14.4       |
| 4 Chamber Average Strain      | -18.6 (4.0)      | 0.4 (3.1)                               | 0.42           | -5.8, 6.7      | 11.9       |
| 4 Chamber LoL Strain          | -20.1 (4.2)      | 0.3 (3.0)                               | 0.62           | -5.7, 6.3      | 10.6       |
| Average Strain                | -18.4 (4.1)      | 0.4 (2.3)                               | 0.35           | -4.2, 5.0      | 8.8        |
| LoL Average Strain            | -19.8 (4.3)      | 0.1 (2.3)                               | 0.73           | -4.5, 4.8      | 8.3        |
| <b><u>Regional Strain</u></b> |                  |                                         |                |                |            |
| <b><u>2 Chamber</u></b>       |                  |                                         |                |                |            |
| Apical Anterior Strain        | -18.0 (8.0)      | 2.2 (9.0)                               | 0.26           | -15.8, 20.1    | 35.4       |
| Apical Inferior Strain        | -22.4 (6.2)      | 3.3 (9.1)                               | 0.02           | -14.8, 21.5    | 28.6       |
| Basal Anterior Strain         | -17.2 (5.5)      | 1.7 (8.0)                               | 0.16           | -14.2, 17.6    | 32.8       |
| Basal Inferior Strain         | -17.8 (7.8)      | 0.5 (8.0)                               | 0.76           | -15.5, 16.5    | 31.9       |
| Mid Anterior Strain           | -18.3 (6.0)      | 0.7 (8.1)                               | 0.63           | -15.5, 16.9    | 31.4       |
| Mid Inferior Strain           | -20.1 (7.1)      | 0.0 (7.1)                               | 0.96           | -14.2, 14.2    | 24.9       |
| <b><u>3 Chamber</u></b>       |                  |                                         |                |                |            |
| Apical Anterior Strain        | -20.7 (7.7)      | -0.7 (7.2)                              | 0.66           | -15.1, 13.7    | 24.6       |
| Apical Posterior Strain       | -16.7 (9.6)      | -1.8 (10.3)                             | 0.43           | -22.4, 18.7    | 43.5       |
| Basal Anteroseptal Strain     | -16.9 (5.4)      | -2.2 (7.6)                              | 0.09           | -17.4, 13.0    | 31.8       |
| Basal Posterior Strain        | -22.9 (6.0)      | 2.6 (8.1)                               | 0.10           | -13.6, 18.9    | 25.2       |
| Mid Anteroseptal Strain       | -19.0 (4.1)      | 0.1 (7.6)                               | 0.92           | -15.0, 15.2    | 28.1       |
| Mid Posterior Strain          | -17.4 (8.0)      | 1.3 (8.7)                               | 0.36           | -16.1, 18.7    | 35.2       |
| <b><u>4 Chamber</u></b>       |                  |                                         |                |                |            |
| Apical Lateral Strain         | -21.9 (9.1)      | 0.9 (7.7)                               | 0.52           | -14.5, 16.4    | 25.0       |
| Apical Septal Strain          | -17.3 (6.3)      | 1.8 (5.8)                               | 0.08           | -9.8, 13.4     | 23.7       |
| Basal Lateral Strain          | -20.4 (6.4)      | -0.2 (9.0)                              | 0.86           | -18.3, 17.8    | 31.3       |
| Basal Septal Strain           | -16.7 (4.6)      | -0.1 (7.4)                              | 0.95           | -14.8, 14.6    | 31.1       |
| Mid Lateral Strain            | -19.7 (7.3)      | -0.1 (6.6)                              | 0.81           | -13.3, 13.1    | 23.7       |
| Mid Septal Strain             | -18.9 (3.7)      | 1.5 (6.2)                               | 0.17           | -10.9, 13.8    | 23.2       |

*VIS = vendor-independent software; LOA = limits of agreement; COV = coefficient of variation*

**Supplemental Table 3.** Agreement of global and regional strain values between GE and Philips VSS. Strains are in %. Positive mean bias indicates Philips was higher (more negative), negative mean bias indicates GE was higher (more negative).

| <i>Variable</i> | <i>Mean (SD)</i> | <i>Mean difference (SD<sub>b</sub>)</i> | <i>P-value</i> | <i>95% LOA</i> | <i>COV</i> |
|-----------------|------------------|-----------------------------------------|----------------|----------------|------------|
|-----------------|------------------|-----------------------------------------|----------------|----------------|------------|

| <i>Variable</i>                  | <i>Mean (SD)</i> | <i>Mean difference (SD<sub>b</sub>)</i> | <i>P-value</i> | <i>95% LOA</i> | <i>COV</i> |
|----------------------------------|------------------|-----------------------------------------|----------------|----------------|------------|
| <b><u>Global Strain</u></b>      |                  |                                         |                |                |            |
| <i>2 Chamber Strain</i>          | -18.2 (4.7)      | 1.6 (3.4)                               | 0.05           | -5.2, 8.3      | 13.1       |
| <i>3 Chamber Strain</i>          | -18.5 (4.4)      | 0.1 (3.1)                               | 0.80           | -6.0, 6.3      | 11.8       |
| <i>4 Chamber Strain</i>          | -18.7 (4.1)      | 0.3 (2.6)                               | 0.36           | -5.0, 5.5      | 9.9        |
| <i>Average Strain</i>            | -18.4 (4.1)      | 0.5 (2.2)                               | 0.15           | -3.8, 4.9      | 8.4        |
| <b><u>Regional Strain</u></b>    |                  |                                         |                |                |            |
| <b><u>2 Chamber</u></b>          |                  |                                         |                |                |            |
| <i>Apical Anterior Strain</i>    | -20.8 (6.4)      | 8.8 (10.0)                              | 0.00           | -11.1, 28.8    | 33.9       |
| <i>Apical Inferior Strain</i>    | -21.8 (5.9)      | -1.5 (5.6)                              | 0.08           | -12.7, 9.8     | 18.3       |
| <i>Basal Anterior Strain</i>     | -14.3 (5.1)      | 3.7 (6.0)                               | 0.00           | -8.3, 15.8     | 29.9       |
| <i>Basal Inferior Strain</i>     | -16.4 (5.0)      | -1.9 (5.1)                              | 0.02           | -12.1, 8.4     | 22.0       |
| <i>Mid Anterior Strain</i>       | -14.0 (4.1)      | 1.2 (6.2)                               | 0.88           | -11.2, 13.7    | 31.6       |
| <i>Mid Inferior Strain</i>       | -21.0 (5.4)      | 0.4 (5.5)                               | 0.74           | -10.6, 11.5    | 18.6       |
| <b><u>3 Chamber</u></b>          |                  |                                         |                |                |            |
| <i>Apical Anterior Strain</i>    | -20.4 (6.6)      | 8.3 (9.6)                               | 0.00           | -10.9, 27.6    | 33.4       |
| <i>Apical Posterior Strain</i>   | -19.2 (6.6)      | 3.7 (9.9)                               | 0.08           | -16.1, 23.5    | 36.5       |
| <i>Basal Anteroseptal Strain</i> | -15.7 (3.5)      | -1.2 (5.7)                              | 0.34           | -12.6, 10.3    | 25.9       |
| <i>Basal Posterior Strain</i>    | -18.7 (5.1)      | -7.9 (9.1)                              | 0.00           | -26.1, 10.3    | 34.4       |
| <i>Mid Anteroseptal Strain</i>   | -16.4 (4.4)      | -2.1 (6.9)                              | 0.09           | -15.9, 11.8    | 29.9       |
| <i>Mid Posterior Strain</i>      | -21.0 (6.9)      | -0.5 (8.0)                              | 0.59           | -16.6, 15.6    | 27.0       |
| <b><u>4 Chamber</u></b>          |                  |                                         |                |                |            |
| <i>Apical Lateral Strain</i>     | -20.7 (6.2)      | -2.3 (6.4)                              | 0.04           | -15.1, 10.5    | 21.8       |
| <i>Apical Septal Strain</i>      | -20.1 (5.5)      | 9.4 (9.1)                               | 0.00           | -8.8, 27.6     | 32.0       |
| <i>Basal Lateral Strain</i>      | -16.7 (5.9)      | -3.6 (6.0)                              | 0.00           | -15.5, 8.4     | 25.4       |
| <i>Basal Septal Strain</i>       | -15.1 (2.8)      | -0.4 (4.4)                              | 0.68           | -9.1, 8.4      | 20.5       |
| <i>Mid Lateral Strain</i>        | -22.4 (5.4)      | -0.1 (4.3)                              | 0.98           | -8.7, 8.4      | 13.5       |
| <i>Mid Septal Strain</i>         | -15.8 (3.3)      | -0.8 (4.7)                              | 0.42           | -10.2, 8.6     | 21.1       |

*VSS = vendor-specific software; LOA = limits of agreement; COV = coefficient of variation*

**Supplemental Table 4.** Agreement of global and regional strain values for GE (VSS) with Tomtec (VIS). Strains are in %. Positive mean bias indicates VIS (Tomtec) was higher (more negative), negative mean bias indicates that VSS was higher (more negative).

| <i>Variable</i>             | <i>Mean (SD)</i> | <i>Mean difference (SD<sub>b</sub>)</i> | <i>P-value</i> | <i>95% LOA</i> | <i>COV</i> |
|-----------------------------|------------------|-----------------------------------------|----------------|----------------|------------|
| <b><u>Global Strain</u></b> |                  |                                         |                |                |            |

| <i>Variable</i>                                                   | <i>Mean (SD)</i>   | <i>Mean difference (SD<sub>b</sub>)</i> | <i>P-value</i> | <i>95% LOA</i>     | <i>COV</i>  |
|-------------------------------------------------------------------|--------------------|-----------------------------------------|----------------|--------------------|-------------|
| <i>2 Chamber - VSS Global Strain vs VIS Average Global Strain</i> | <i>-18.1 (5.3)</i> | <i>0.1 (3.1)</i>                        | <i>0.91</i>    | <i>-6.2, 6.3</i>   | <i>12.3</i> |
| <i>2 Chamber - VSS Global Strain vs VIS LoL Global Strain</i>     | <i>-19.1 (5.4)</i> | <i>2.2 (3.1)</i>                        | <i>&lt;.01</i> | <i>-4.1, 8.4</i>   | <i>11.6</i> |
| <i>3 Chamber - VSS Global Strain vs VIS Average Global Strain</i> | <i>-18.3 (4.4)</i> | <i>-0.1 (3.3)</i>                       | <i>0.92</i>    | <i>-6.6, 6.4</i>   | <i>12.6</i> |
| <i>3 Chamber - VSS Global Strain vs VIS LoL Global Strain</i>     | <i>-18.6 (4.6)</i> | <i>0.5 (3.9)</i>                        | <i>0.41</i>    | <i>-7.2, 8.3</i>   | <i>14.7</i> |
| <i>4 Chamber - VSS Global Strain vs VIS Average Global Strain</i> | <i>-18.4 (4.2)</i> | <i>0.0 (2.9)</i>                        | <i>0.95</i>    | <i>-5.7, 5.8</i>   | <i>11.0</i> |
| <i>4 Chamber - VSS Global Strain vs VIS LoL Global Strain</i>     | <i>-19.2 (4.2)</i> | <i>1.6 (2.9)</i>                        | <i>&lt;.01</i> | <i>-4.2, 7.4</i>   | <i>10.8</i> |
| <i>VSS Global Strain vs VIS LoL Global Strain</i>                 | <i>-19.0 (4.5)</i> | <i>1.4 (2.0)</i>                        | <i>&lt;.01</i> | <i>-2.5, 5.4</i>   | <i>7.4</i>  |
| <i>VSS Global Strain vs VIS Average Global Strain</i>             | <i>-18.3 (4.4)</i> | <i>0.0 (2.0)</i>                        | <i>0.98</i>    | <i>-3.9, 3.9</i>   | <i>7.6</i>  |
| <b><u>Regional Strain</u></b>                                     |                    |                                         |                |                    |             |
| <b><u>2 Chamber</u></b>                                           |                    |                                         |                |                    |             |
| <i>Apical Anterior Strain</i>                                     | <i>-17.4 (7.3)</i> | <i>0.0 (10.2)</i>                       | <i>0.86</i>    | <i>-20.4, 20.4</i> | <i>41.4</i> |
| <i>Apical Inferior Strain</i>                                     | <i>-22.2 (7.2)</i> | <i>-2.8 (8.1)</i>                       | <i>0.09</i>    | <i>-18.9, 13.4</i> | <i>25.7</i> |
| <i>Basal Anterior Strain</i>                                      | <i>-14.7 (6.4)</i> | <i>3.3 (6.4)</i>                        | <i>0.01</i>    | <i>-9.6, 16.1</i>  | <i>31.0</i> |
| <i>Basal Inferior Strain</i>                                      | <i>-17.9 (6.5)</i> | <i>0.3 (8.3)</i>                        | <i>0.75</i>    | <i>-16.4, 17.0</i> | <i>33.0</i> |
| <i>Mid Anterior Strain</i>                                        | <i>-16.2 (6.6)</i> | <i>3.7 (6.1)</i>                        | <i>&lt;.01</i> | <i>-8.5, 16.0</i>  | <i>26.7</i> |
| <i>Mid Inferior Strain</i>                                        | <i>-20.8 (6.3)</i> | <i>-0.6 (6.2)</i>                       | <i>0.50</i>    | <i>-13.1, 11.9</i> | <i>21.2</i> |
| <b><u>3 Chamber</u></b>                                           |                    |                                         |                |                    |             |
| <i>Apical Anterior Strain</i>                                     | <i>-19.3 (7.3)</i> | <i>4.3 (8.0)</i>                        | <i>0.01</i>    | <i>-11.8, 20.4</i> | <i>29.5</i> |
| <i>Apical Posterior Strain</i>                                    | <i>-17.9 (8.7)</i> | <i>0.0 (8.7)</i>                        | <i>0.94</i>    | <i>-17.4, 17.4</i> | <i>34.4</i> |
| <i>Basal Anteroseptal Strain 3</i>                                | <i>-17.1 (4.9)</i> | <i>1.8 (7.1)</i>                        | <i>0.14</i>    | <i>-12.4, 16.0</i> | <i>29.3</i> |
| <i>Basal Posterior Strain</i>                                     | <i>-21.8 (5.6)</i> | <i>-1.7 (9.4)</i>                       | <i>0.42</i>    | <i>-20.4, 17.1</i> | <i>30.4</i> |
| <i>Mid Anteroseptal Strain</i>                                    | <i>-18.4 (4.4)</i> | <i>1.2 (6.9)</i>                        | <i>0.32</i>    | <i>-12.6, 14.9</i> | <i>26.4</i> |
| <i>Mid Posterior Strain</i>                                       | <i>-19.4 (7.2)</i> | <i>-4.1 (6.6)</i>                       | <i>0.01</i>    | <i>-17.4, 9.2</i>  | <i>24.2</i> |
| <b><u>4 Chamber</u></b>                                           |                    |                                         |                |                    |             |
| <i>Apical Lateral Strain</i>                                      | <i>-21.2 (8.8)</i> | <i>-0.5 (7.4)</i>                       | <i>0.78</i>    | <i>-15.4, 14.4</i> | <i>24.9</i> |
| <i>Apical Septal</i>                                              | <i>-16.0 (6.5)</i> | <i>0.8 (7.4)</i>                        | <i>0.51</i>    | <i>-13.9, 15.6</i> | <i>32.7</i> |
| <i>Basal Lateral Strain</i>                                       | <i>-19.7 (6.6)</i> | <i>2.0 (8.4)</i>                        | <i>0.12</i>    | <i>-14.7, 18.8</i> | <i>30.0</i> |
| <i>Basal Septal Strain</i>                                        | <i>-16.0 (3.9)</i> | <i>1.5 (5.2)</i>                        | <i>0.09</i>    | <i>-8.8, 11.9</i>  | <i>22.8</i> |
| <i>Mid Lateral Strain</i>                                         | <i>-20.9 (6.4)</i> | <i>-2.4 (6.2)</i>                       | <i>0.03</i>    | <i>-14.7, 10.0</i> | <i>20.9</i> |
| <i>Mid Septal Strain</i>                                          | <i>-17.1 (3.1)</i> | <i>2.1 (5.1)</i>                        | <i>0.02</i>    | <i>-8.2, 12.3</i>  | <i>21.2</i> |

*VSS = vendor-specific software; VIS = vendor-independent software; LOA = limits of agreement; COV = coefficient of variation*

**Supplemental Table 5.** Agreement of global and regional strain values for Philips (VSS) with Tomtec (VIS). Strains are in %. Positive mean bias indicates VIS (Tomtec)

was higher (more negative), negative mean bias indicates that VSS was higher (more negative).

| <i>Variable</i>                                                   | <i>Mean (SD)</i>   | <i>Mean difference (SD<sub>b</sub>)</i> | <i>P-value</i> | <i>95% LOA</i>     | <i>COV</i>  |
|-------------------------------------------------------------------|--------------------|-----------------------------------------|----------------|--------------------|-------------|
| <b><u>Global Strain</u></b>                                       |                    |                                         |                |                    |             |
| <i>2 Chamber - VSS Global Strain vs VIS Average Global Strain</i> | <i>-18.4 (4.9)</i> | <i>-0.1 (3.0)</i>                       | <i>0.48</i>    | <i>-6.2, 5.9</i>   | <i>11.6</i> |
| <i>2 Chamber - VSS Global Strain vs VIS LoL Global Strain</i>     | <i>-19.3 (4.9)</i> | <i>1.6 (3.2)</i>                        | <i>0.14</i>    | <i>-4.7, 7.9</i>   | <i>11.6</i> |
| <i>3 Chamber - VSS Global Strain vs VIS Average Global Strain</i> | <i>-18.3 (4.2)</i> | <i>-0.3 (3.4)</i>                       | <i>0.51</i>    | <i>-7.0, 6.5</i>   | <i>13.1</i> |
| <i>3 Chamber - VSS Global Strain vs VIS LoL Global Strain</i>     | <i>-18.7 (4.5)</i> | <i>0.6 (3.9)</i>                        | <i>0.41</i>    | <i>-7.1, 8.3</i>   | <i>14.6</i> |
| <i>4 Chamber - VSS Global Strain vs VIS Average Global Strain</i> | <i>-18.6 (4.0)</i> | <i>-0.1 (2.9)</i>                       | <i>0.96</i>    | <i>-5.8, 5.6</i>   | <i>10.9</i> |
| <i>4 Chamber - VSS Global Strain vs VIS LoL Global Strain</i>     | <i>-19.3 (4.1)</i> | <i>1.4 (2.9)</i>                        | <i>0.01</i>    | <i>-4.4, 7.2</i>   | <i>10.7</i> |
| <i>VSS Global Strain vs VIS Average Global Strain</i>             | <i>-18.4 (4.1)</i> | <i>-0.1 (2.0)</i>                       | <i>0.67</i>    | <i>-4.1, 3.9</i>   | <i>7.7</i>  |
| <i>VSS Global Strain vs VIS LoL Global Strain</i>                 | <i>-19.1 (4.2)</i> | <i>1.2 (2.0)</i>                        | <i>0.01</i>    | <i>-2.9, 5.3</i>   | <i>7.5</i>  |
| <b><u>Regional Strain</u></b>                                     |                    |                                         |                |                    |             |
| <b><u>2 Chamber</u></b>                                           |                    |                                         |                |                    |             |
| <i>Apical Anterior Strain</i>                                     | <i>-19.3 (7.3)</i> | <i>-3.2 (10.7)</i>                      | <i>&lt;.01</i> | <i>-24.6, 18.1</i> | <i>38.9</i> |
| <i>Apical Inferior Strain</i>                                     | <i>-22.2 (6.4)</i> | <i>0.1 (8.0)</i>                        | <i>0.01</i>    | <i>-15.9, 16.0</i> | <i>25.4</i> |
| <i>Basal Anterior Strain</i>                                      | <i>-15.7 (5.8)</i> | <i>2.5 (6.0)</i>                        | <i>0.13</i>    | <i>-9.5, 14.6</i>  | <i>27.2</i> |
| <i>Basal Inferior Strain</i>                                      | <i>-17.4 (6.4)</i> | <i>1.8 (7.9)</i>                        | <i>0.01</i>    | <i>-14.0, 17.5</i> | <i>32.1</i> |
| <i>Mid Anterior Strain</i>                                        | <i>-16.4 (5.8)</i> | <i>3.9 (5.7)</i>                        | <i>&lt;.01</i> | <i>-7.4, 15.3</i>  | <i>24.5</i> |
| <i>Mid Inferior Strain</i>                                        | <i>-20.5 (6.1)</i> | <i>-1.1 (6.5)</i>                       | <i>0.37</i>    | <i>-14.0, 11.9</i> | <i>22.2</i> |
| <b><u>3 Chamber</u></b>                                           |                    |                                         |                |                    |             |
| <i>Apical Anterior Strain</i>                                     | <i>-20.4 (7.3)</i> | <i>0.3 (8.9)</i>                        | <i>0.01</i>    | <i>-17.5, 18.1</i> | <i>30.8</i> |
| <i>Apical Posterior Strain</i>                                    | <i>-17.7 (8.3)</i> | <i>-1.9 (8.6)</i>                       | <i>&lt;.01</i> | <i>-19.0, 15.2</i> | <i>34.2</i> |
| <i>Basal Anteroseptal Strain</i>                                  | <i>-16.5 (4.6)</i> | <i>1.5 (7.0)</i>                        | <i>0.58</i>    | <i>-12.6, 15.6</i> | <i>30.1</i> |
| <i>Basal Posterior Strain</i>                                     | <i>-20.5 (5.5)</i> | <i>2.7 (10.7)</i>                       | <i>&lt;.01</i> | <i>-18.7, 24.0</i> | <i>36.8</i> |
| <i>Mid Anteroseptal Strain</i>                                    | <i>-17.8 (4.4)</i> | <i>2.2 (6.6)</i>                        | <i>0.01</i>    | <i>-11.1, 15.5</i> | <i>26.3</i> |
| <i>Mid Posterior Strain</i>                                       | <i>-20.0 (7.1)</i> | <i>-2.5 (8.2)</i>                       | <i>0.48</i>    | <i>-19.0, 14.0</i> | <i>29.2</i> |
| <b><u>4 Chamber</u></b>                                           |                    |                                         |                |                    |             |
| <i>Apical Lateral Strain</i>                                      | <i>-21.0 (7.3)</i> | <i>0.9 (8.1)</i>                        | <i>0.08</i>    | <i>-15.4, 17.1</i> | <i>27.4</i> |
| <i>Apical Septal Strain</i>                                       | <i>-18.5 (6.3)</i> | <i>-2.9 (9.1)</i>                       | <i>&lt;.01</i> | <i>-21.2, 15.4</i> | <i>35.0</i> |
| <i>Basal Lateral Strain</i>                                       | <i>-18.4 (6.2)</i> | <i>3.6 (8.0)</i>                        | <i>&lt;.01</i> | <i>-12.4, 19.6</i> | <i>30.9</i> |
| <i>Basal Septal Strain</i>                                        | <i>-15.9 (3.9)</i> | <i>1.6 (5.8)</i>                        | <i>0.11</i>    | <i>-10.0, 13.1</i> | <i>25.7</i> |
| <i>Mid Lateral Strain</i>                                         | <i>-20.9 (6.4)</i> | <i>-2.4 (6.7)</i>                       | <i>0.04</i>    | <i>-15.9, 11.1</i> | <i>22.8</i> |
| <i>Mid Septal Strain</i>                                          | <i>-17.2 (3.4)</i> | <i>2.9 (5.5)</i>                        | <i>&lt;.01</i> | <i>-8.0, 13.9</i>  | <i>22.5</i> |

*VSS = vendor-specific software; VIS = vendor-independent software; LOA = limits of agreement; COV = coefficient of variation*
